# Supplementary material for: A Probabilistic Traffic-Theoretic Network Loading Model Suitable for Large-Scale Network Analysis
Source: Atypon-hosted journal article supplement (doi:10.1287/trsc.2017.0804), 2018-06-26
Supplement: trsc.2017.0804-sm.pdf [file trsc.2017.0804-sm.pdf]

# Appendices

## A Estimation of the weight parameter $\tilde{w}$

This section describes the procedure followed to formulate, and to fit the coefficients of, the weight parameter of Equation (40). Recall that the goal of the mixture model is to accurately approximate the upstream and the downstream boundary conditions of the link. In other words, it should yield an accurate approximation of the distribution of UQ and of DQ. We consider a single isolated link and conduct a total of 180 experiments with varied combinations of the space capacity ( $\ell \in \{5, 10, 15, \dots, 100\}$ ), the traffic intensity ( $\rho = \lambda/\mu \in \{0.25, 0.5, 0.75\}$ ) and the service rate (or downstream flow capacity) ( $\mu \in \{0.2, 0.4, 0.6\}$ ). Each experiment considers a time period of duration 250 seconds. For each experiment we compare the approximation of the UQ and of the DQ distributions, over time  $T$ , to the distributions estimated via stochastic simulation with a discrete-event simulator of the stochastic link transmissions model. Based on the results of these experiments, we first observed that the parameters that most impact the quality of the approximation are  $\ell$ ,  $\mu$  and  $k^{\text{fwd}}$ . This lead us to formulate the following expression for the weight parameter:

$$\tilde{w}(\ell, \mu, k^{\text{fwd}}; \beta) = e^{-\frac{\ell^2}{\beta \mu k^{\text{fwd}}}}, \quad (1)$$

where  $\beta$  is a scalar coefficient. The coefficient is fit such as to minimize, over all 180 experiments, the following error function:

$$\frac{1}{2} \left[ \frac{1}{250} \sum_{T=1}^{250} \text{JSD}(P_1^{\text{UQ}}(T) \parallel P_2^{\text{UQ}}(T)) \right] + \frac{1}{2} \left[ \frac{1}{250} \sum_{T=1}^{250} \text{JSD}(P_1^{\text{DQ}}(T) \parallel P_2^{\text{DQ}}(T)) \right], \quad (2)$$

where  $P_1^{\text{UQ}}(T)$  (resp.  $P_1^{\text{DQ}}(T)$ ) is the UQ (resp. DQ) distribution obtained from the mixture model at time  $T$  and  $P_2^{\text{UQ}}(T)$  (resp.  $P_2^{\text{DQ}}(T)$ ) is the UQ (resp. DQ) distribution estimated via stochastic simulation at time  $T$ . The two summations of (2) consider the error in the UQ distributions and in the DQ distributions, respectively. This leads to  $\beta = 70$ . This results in the final weight parameter expression defined in Equation (40).

## B Tables of time-average JSD metric

Tables 1 and 2 display, respectively, the time-average JSD metric of the UQ and DQ distributions.

| Experiment   |        | Time-average JSD of the UQ distribution |              |        |        |        |
|--------------|--------|-----------------------------------------|--------------|--------|--------|--------|
| $\lambda(k)$ | $\ell$ | Mixture                                 | Multivariate | DetDet | DetExp | ExpDet |
| 0.1          | 10     | 0.0010                                  | 0.0000       | 0.3539 | 0.2600 | 0.0003 |
|              | 20     | 0.0012                                  | 0.0000       | 0.3988 | 0.3177 | 0.0001 |
|              | 30     | 0.0013                                  | 0.0000       | 0.4248 | 0.3543 | 0.0001 |
|              | 40     | 0.0014                                  | NaN          | 0.4402 | 0.3779 | 0.0000 |
|              | 60     | 0.0013                                  | NaN          | 0.4590 | 0.4111 | 0.0000 |
|              | 80     | 0.0011                                  | NaN          | 0.4692 | 0.4320 | 0.0000 |
|              | 100    | 0.0010                                  | NaN          | 0.4753 | 0.4489 | 0.0000 |
| 0.2          | 10     | 0.0054                                  | 0.0000       | 0.4261 | 0.2434 | 0.0020 |
|              | 20     | 0.0068                                  | 0.0000       | 0.4644 | 0.3080 | 0.0013 |
|              | 30     | 0.0070                                  | 0.0000       | 0.4839 | 0.3476 | 0.0008 |
|              | 40     | 0.0070                                  | NaN          | 0.4961 | 0.3767 | 0.0005 |
|              | 60     | 0.0062                                  | NaN          | 0.5105 | 0.4189 | 0.0003 |
|              | 80     | 0.0054                                  | NaN          | 0.5181 | 0.4476 | 0.0001 |
|              | 100    | 0.0045                                  | NaN          | 0.5223 | 0.4713 | 0.0001 |
| 0.3          | 10     | 0.0081                                  | 0.0000       | 0.4654 | 0.1615 | 0.0036 |
|              | 20     | 0.0206                                  | 0.0000       | 0.5071 | 0.2387 | 0.0045 |
|              | 30     | 0.0237                                  | 0.0000       | 0.5214 | 0.2863 | 0.0041 |
|              | 40     | 0.0223                                  | NaN          | 0.5294 | 0.3215 | 0.0032 |
|              | 60     | 0.0182                                  | NaN          | 0.5384 | 0.3772 | 0.0016 |
|              | 80     | 0.0145                                  | NaN          | 0.5434 | 0.4215 | 0.0008 |
|              | 100    | 0.0115                                  | NaN          | 0.5458 | 0.4602 | 0.0004 |

Table 1: Time-average JSD metric of the UQ distribution. The value NaN denotes cases where the evaluation of the multivariate model exceeded the limit of 40 hours.

| Experiment   |        | Time-average JSD of the DQ distribution |              |        |        |        |
|--------------|--------|-----------------------------------------|--------------|--------|--------|--------|
| $\lambda(k)$ | $\ell$ | Mixture                                 | Multivariate | DetDet | DetExp | ExpDet |
| 0.1          | 10     | 0.0007                                  | 0.0000       | 0.1550 | 0.0486 | 0.0028 |
|              | 20     | 0.0002                                  | 0.0000       | 0.1530 | 0.0476 | 0.0028 |
|              | 30     | 0.0000                                  | 0.0000       | 0.1486 | 0.0468 | 0.0027 |
|              | 40     | 0.0000                                  | NaN          | 0.1466 | 0.0460 | 0.0026 |
|              | 60     | 0.0000                                  | NaN          | 0.1401 | 0.0441 | 0.0025 |
|              | 80     | 0.0000                                  | NaN          | 0.1335 | 0.0422 | 0.0024 |
|              | 100    | 0.0000                                  | NaN          | 0.1270 | 0.0402 | 0.0022 |
| 0.2          | 10     | 0.0030                                  | 0.0000       | 0.2679 | 0.0527 | 0.0115 |
|              | 20     | 0.0008                                  | 0.0000       | 0.2640 | 0.0538 | 0.0112 |
|              | 30     | 0.0002                                  | 0.0000       | 0.2584 | 0.0538 | 0.0107 |
|              | 40     | 0.0000                                  | NaN          | 0.2528 | 0.0518 | 0.0105 |
|              | 60     | 0.0000                                  | NaN          | 0.2414 | 0.0497 | 0.0099 |
|              | 80     | 0.0000                                  | NaN          | 0.2301 | 0.0476 | 0.0095 |
|              | 100    | 0.0000                                  | NaN          | 0.2188 | 0.0456 | 0.0089 |
| 0.3          | 10     | 0.0077                                  | 0.0000       | 0.3677 | 0.0347 | 0.0262 |
|              | 20     | 0.0033                                  | 0.0000       | 0.3811 | 0.0507 | 0.0217 |
|              | 30     | 0.0007                                  | 0.0000       | 0.3760 | 0.0544 | 0.0202 |
|              | 40     | 0.0002                                  | NaN          | 0.3680 | 0.0539 | 0.0196 |
|              | 60     | 0.0000                                  | NaN          | 0.3512 | 0.0516 | 0.0184 |
|              | 80     | 0.0000                                  | NaN          | 0.3343 | 0.0492 | 0.0174 |
|              | 100    | 0.0000                                  | NaN          | 0.3173 | 0.0467 | 0.0164 |

Table 2: Time-average JSD metric of the DQ distribution. The value NaN denotes cases where the evaluation of the multivariate model exceeded the limit of 40 hours.
